# Supplementary material for: Public reporting of antipsychotic prescribing in nursing homes: population-based interrupted time series analyses
Source: PubMed Central journal article supplement — BMJ Qual Saf. 2018 Jul 30;28(2):121–31. doi: 10.1136/bmjqs-2018-007840 (PMC6373421; doi:10.1136/bmjqs-2018-007840), 2018-07-30

**Appendix 2: Goodness of fit criteria for candidate interruption months before and after the theoretical change point for antipsychotic prescribing: Newspaper article (A) vs. CIHI report (B)**

**(A) Goodness of fit for newspaper article**

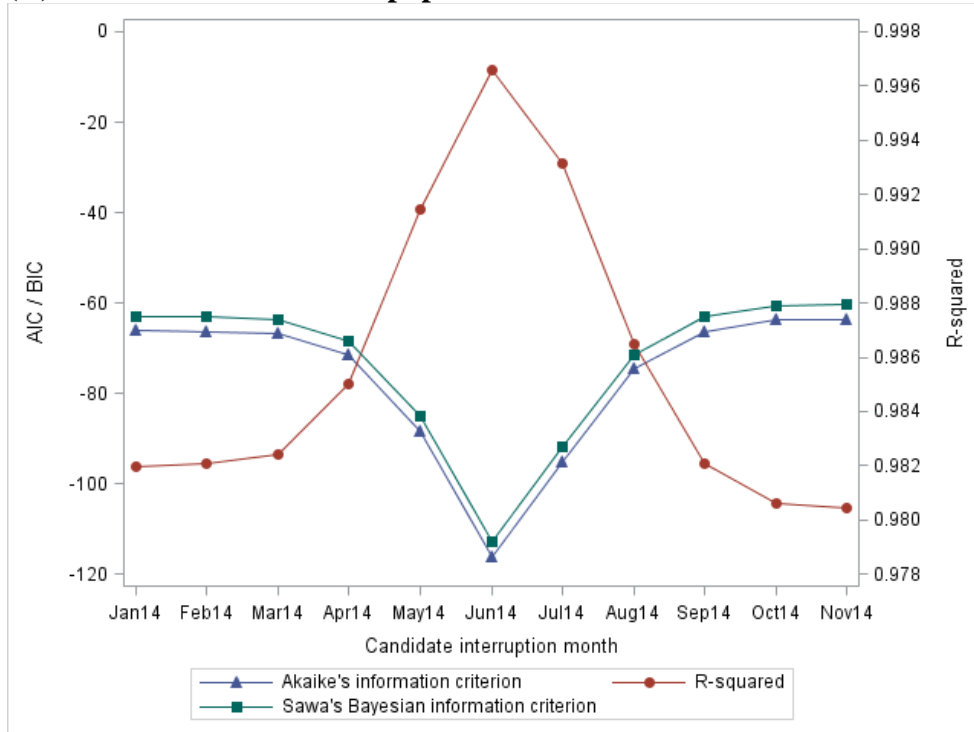

**(B) Goodness of fit for CIHI report**

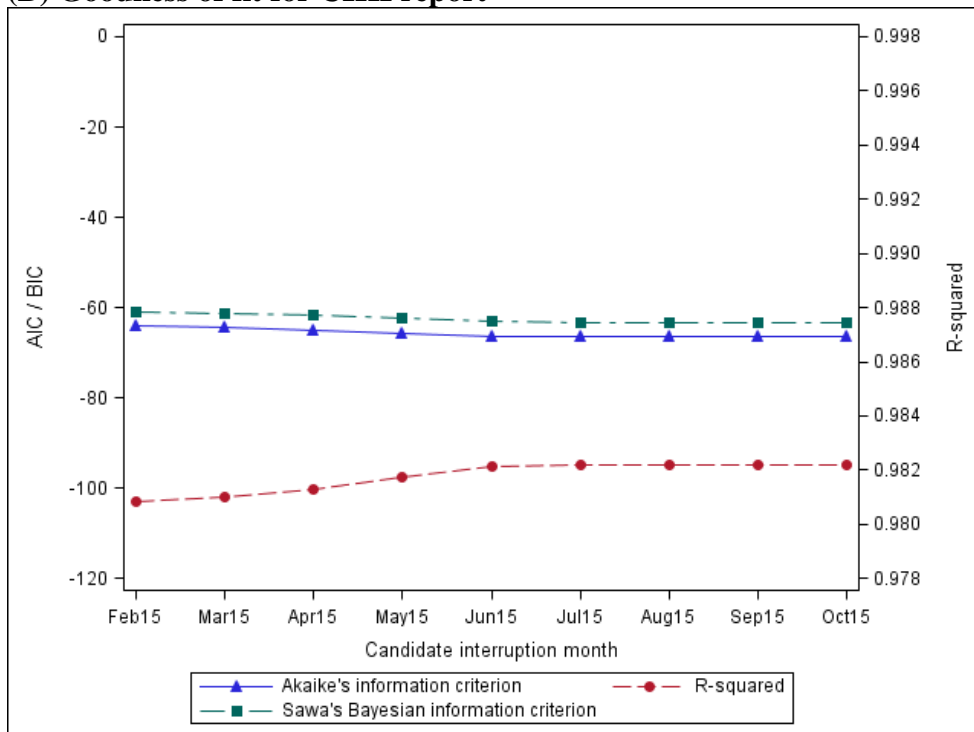

Supplement: bmjqs-2018-007840supp002.pdf [file bmjqs-2018-007840supp002.pdf]
