# Supplementary material for: Public reporting of antipsychotic prescribing in nursing homes: population-based interrupted time series analyses
Source: PubMed Central journal article supplement — BMJ Qual Saf. 2018 Jul 30;28(2):121–31. doi: 10.1136/bmjqs-2018-007840 (PMC6373421; doi:10.1136/bmjqs-2018-007840), 2018-07-30

**Appendix 3: Trends in antipsychotic prescribing stratified by resident, physician, and nursing home characteristics, Ontario, Canada (October 2013 – March 2016)**

**A) Antipsychotic prescribing by resident history of psychosis**

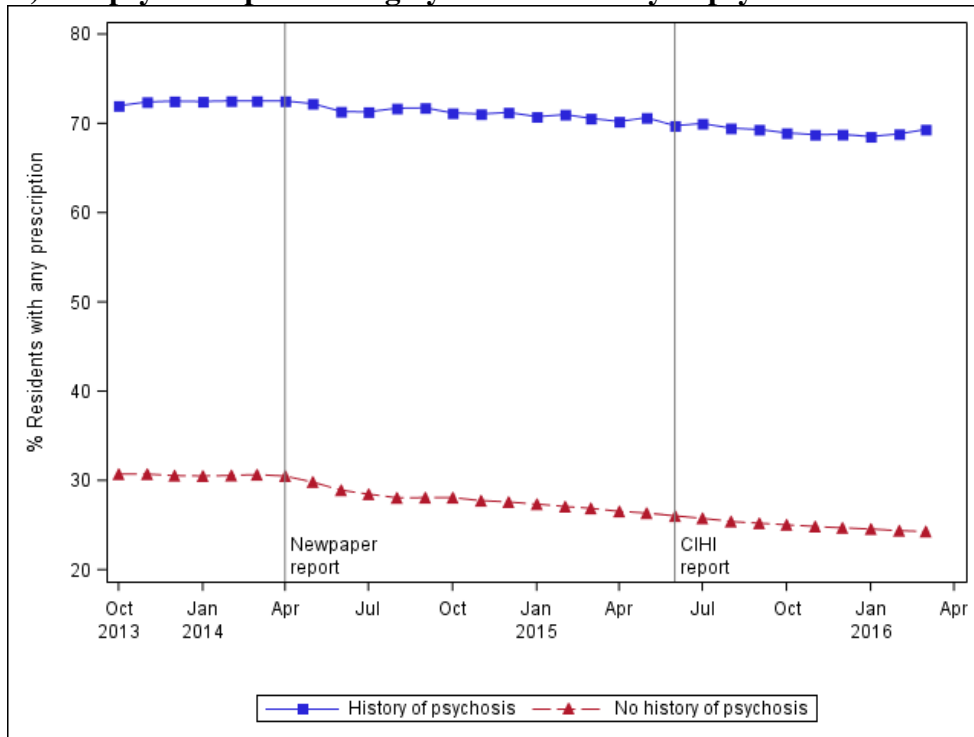

**B) Antipsychotic prescribing by resident sex**

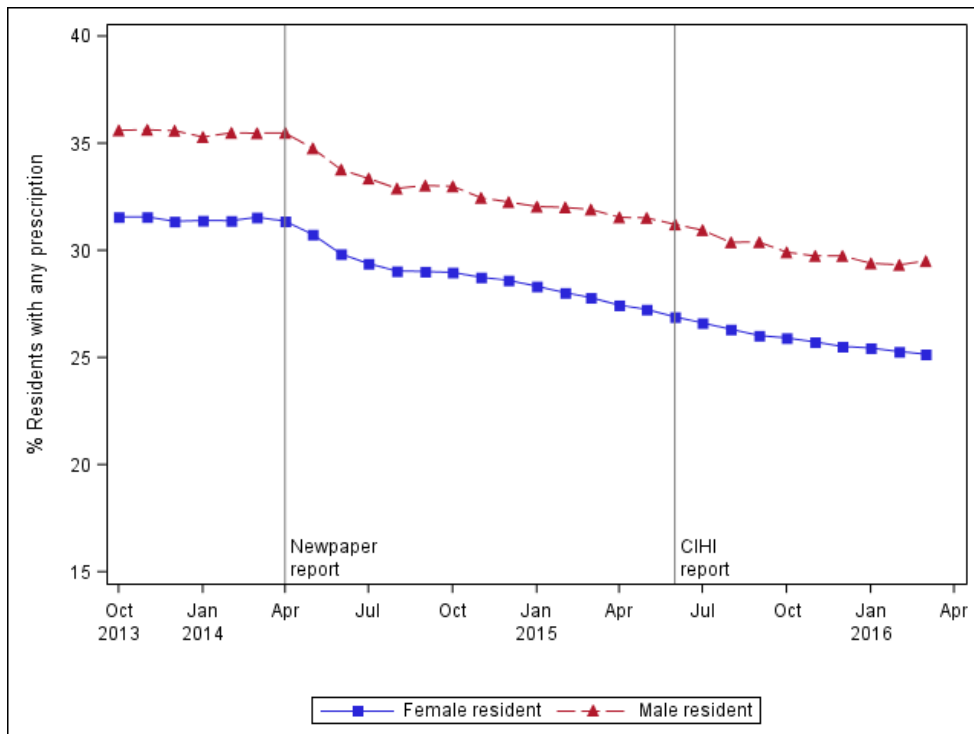

**C) Antipsychotic prescribing by physician sex**

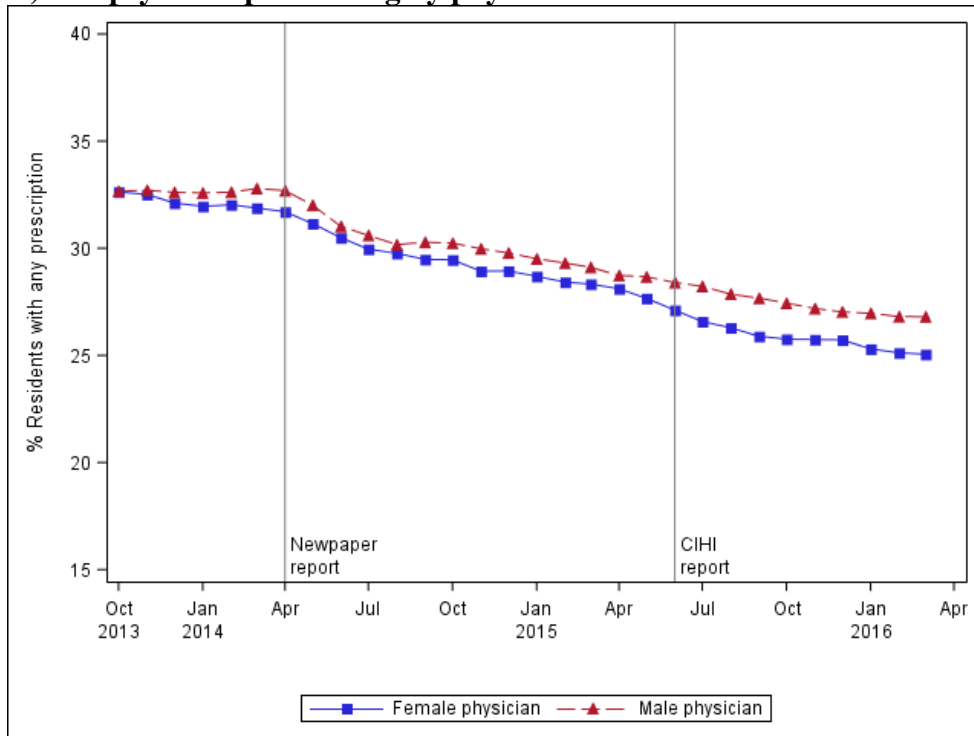

**D) Antipsychotic number of residents in the physician's practice**

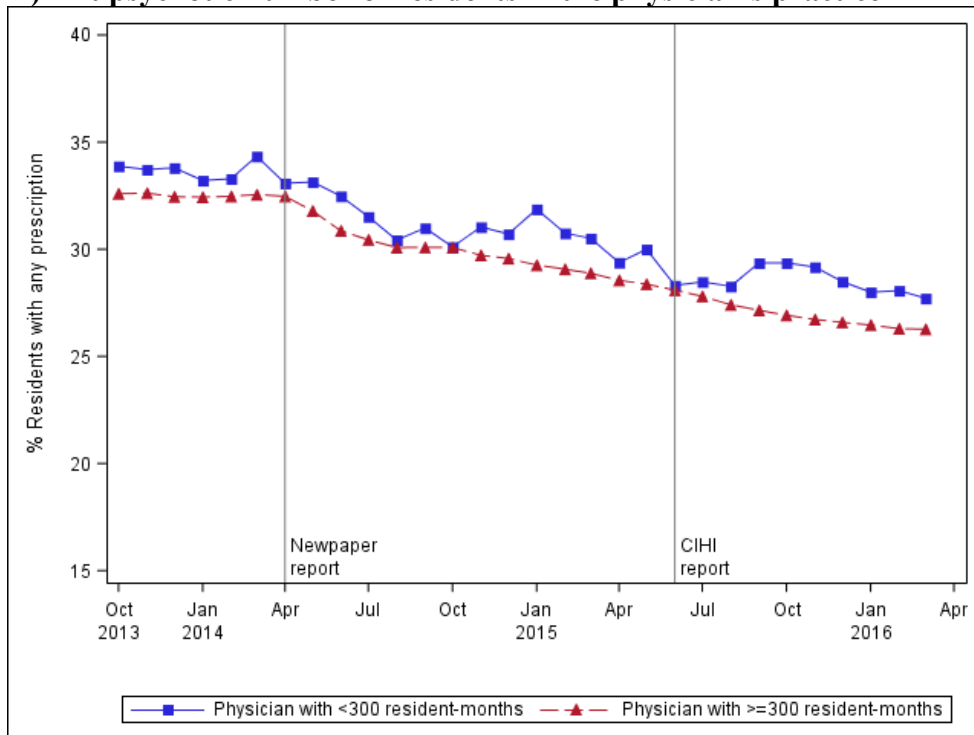

**E) Antipsychotic prescribing by nursing home ownership type**

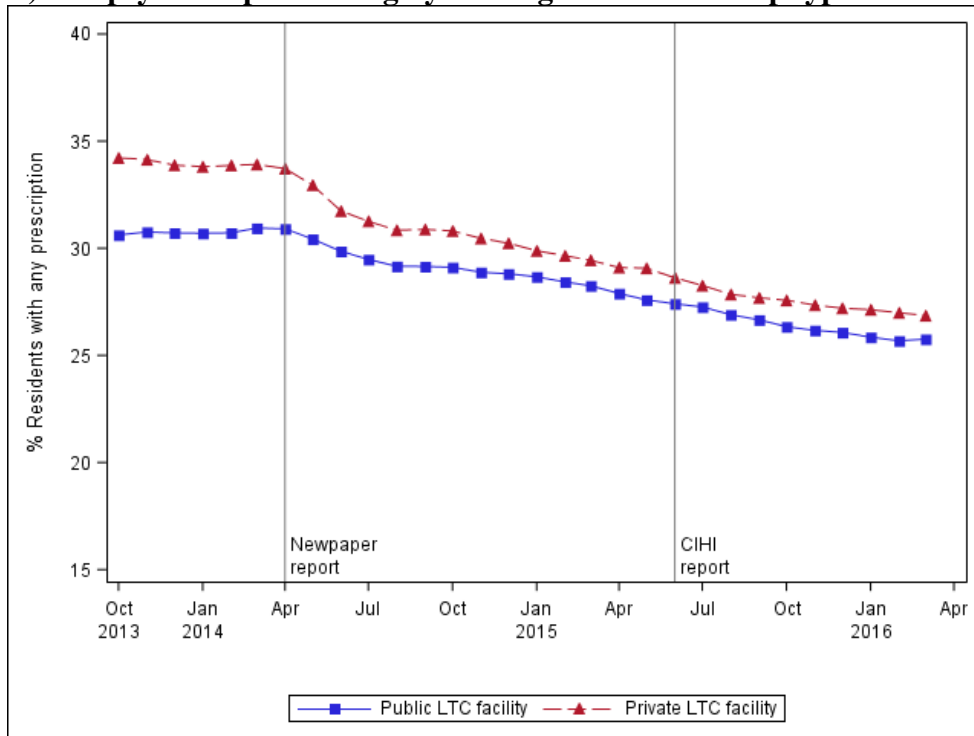

Supplement: bmjqs-2018-007840supp003.pdf [file bmjqs-2018-007840supp003.pdf]
