# Supplementary figures and images for: Public reporting of antipsychotic prescribing in nursing homes: population-based interrupted time series analyses
Source: PubMed Central journal article supplement — BMJ Qual Saf. 2018 Jul 30;28(2):121–31. doi: 10.1136/bmjqs-2018-007840 (PMC6373421; doi:10.1136/bmjqs-2018-007840), 2018-07-30

**Appendix 1: Cohort creation flow diagram**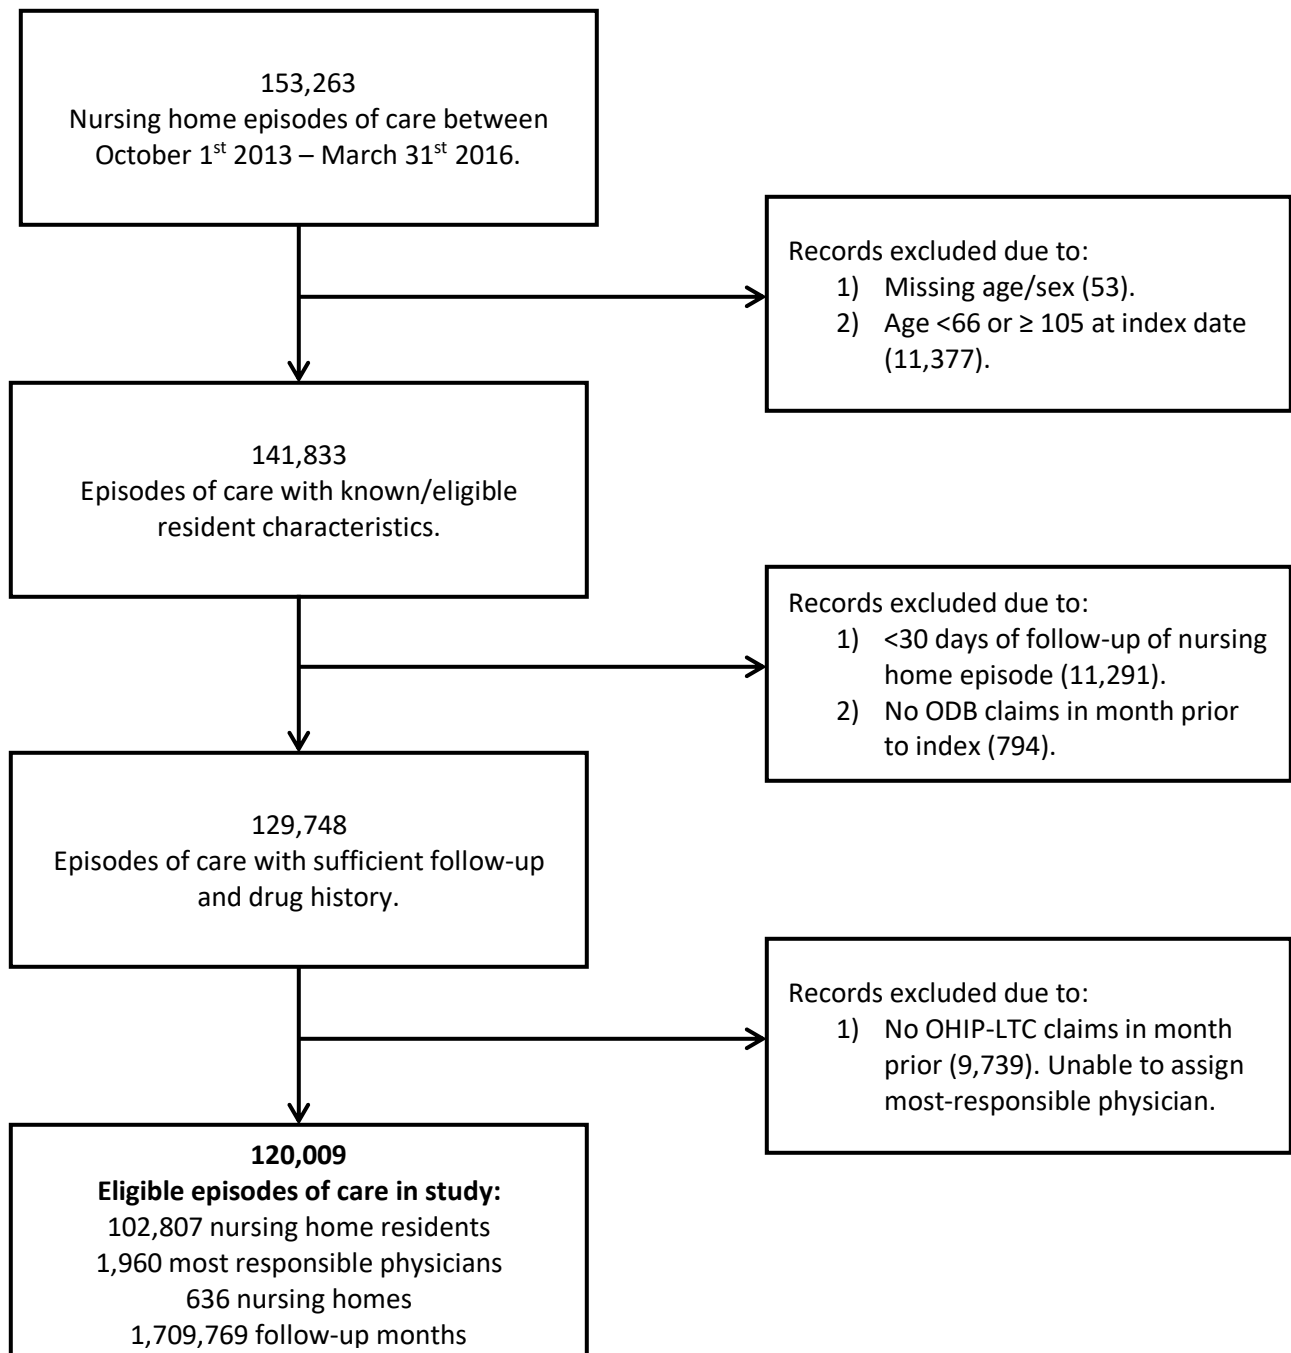

Supplement: bmjqs-2018-007840supp001.pdf [file bmjqs-2018-007840supp001.pdf]
